# Supplementary material for: IQCA-TASS: a nano-scaled P-selectin inhibitor capable of targeting thrombus and releasing IQCA/TARGD(S)S in vivo
Source: Royal Society of Chemistry journal article supplement (doi:10.1039/c6tb02705a), 2016-12-15
Supplement: c6tb02705a1.pdf [file c6tb02705a1.pdf]

**IQCA-TASS: A nano-scaled P-selectin inhibitor capable of targeting thrombus and releasing IQCA/TARGD(S)S *in vivo***†

Jianhui Wu,<sup>a,§</sup> Haimei Zhu,<sup>a,§</sup> Ming Zhao,<sup>a,b,\*</sup> Yuji Wang,<sup>a</sup> Guodong Yang,<sup>a</sup> Yaonan Wang,<sup>a</sup> Shurui Zhao,<sup>a</sup> Lin Gui,<sup>a</sup> Xiaoyi Zhang,<sup>a</sup> and Shiqi Peng<sup>a,\*</sup>

<sup>a</sup> Beijing Area Major Laboratory of Peptide and Small Molecular Drugs, Engineering Research Center of Endogenous Prophylactic of Ministry of Education of China, Beijing Laboratory of Biomedical Materials, College of Pharmaceutical Sciences, Capital Medical University, Beijing 100069, PR China.

<sup>b</sup> Department of Biomedical Science and Environmental Biology, Kaohsiung Medical University, Kaohsiung, Taiwan.

§ These authors contributed equally.

\*Corresponding authors. E-mail addresses: mingzhao@bjmu.edu.cn (M. Zhao), sqpeng@bjmu.edu.cn (S. Peng).

†The authors declare no competing interests.

# 1. NMR spectra of IQCA-TASS

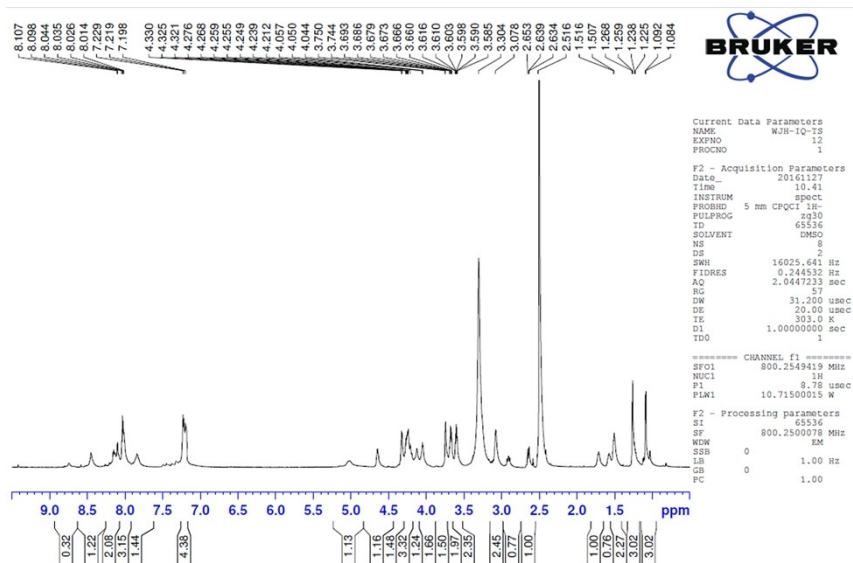

Figure 1. <sup>1</sup>H NMR spectrum of IQCA-TASS.

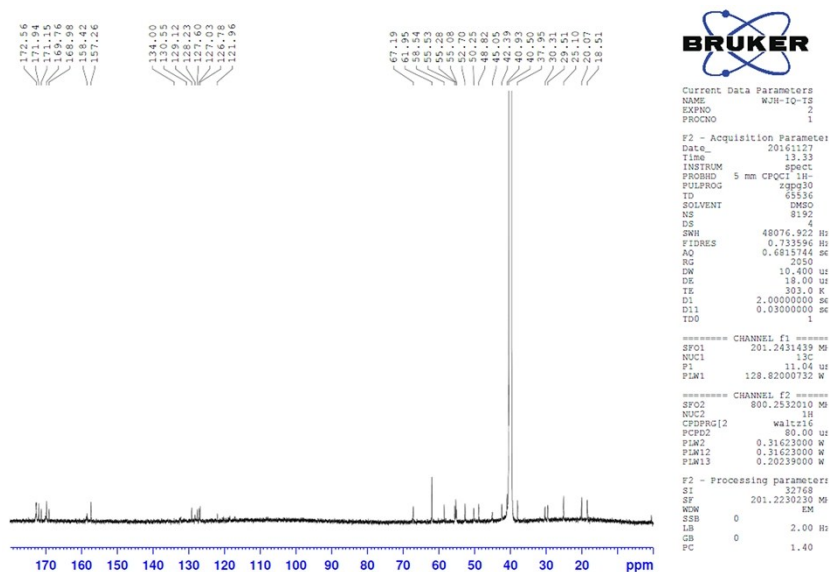

Figure 2. <sup>13</sup>C NMR spectrum of IQCA-TASS.
